# Supplementary material for: Coupling VIGS with Short- and Long-Term Stress Exposure to Understand the Fiskeby III Iron Deficiency Stress Response
Source: MDPI journal article supplement (doi:10.3390/ijms24010647), 2022-12-30
Supplement: s1 [file s1]

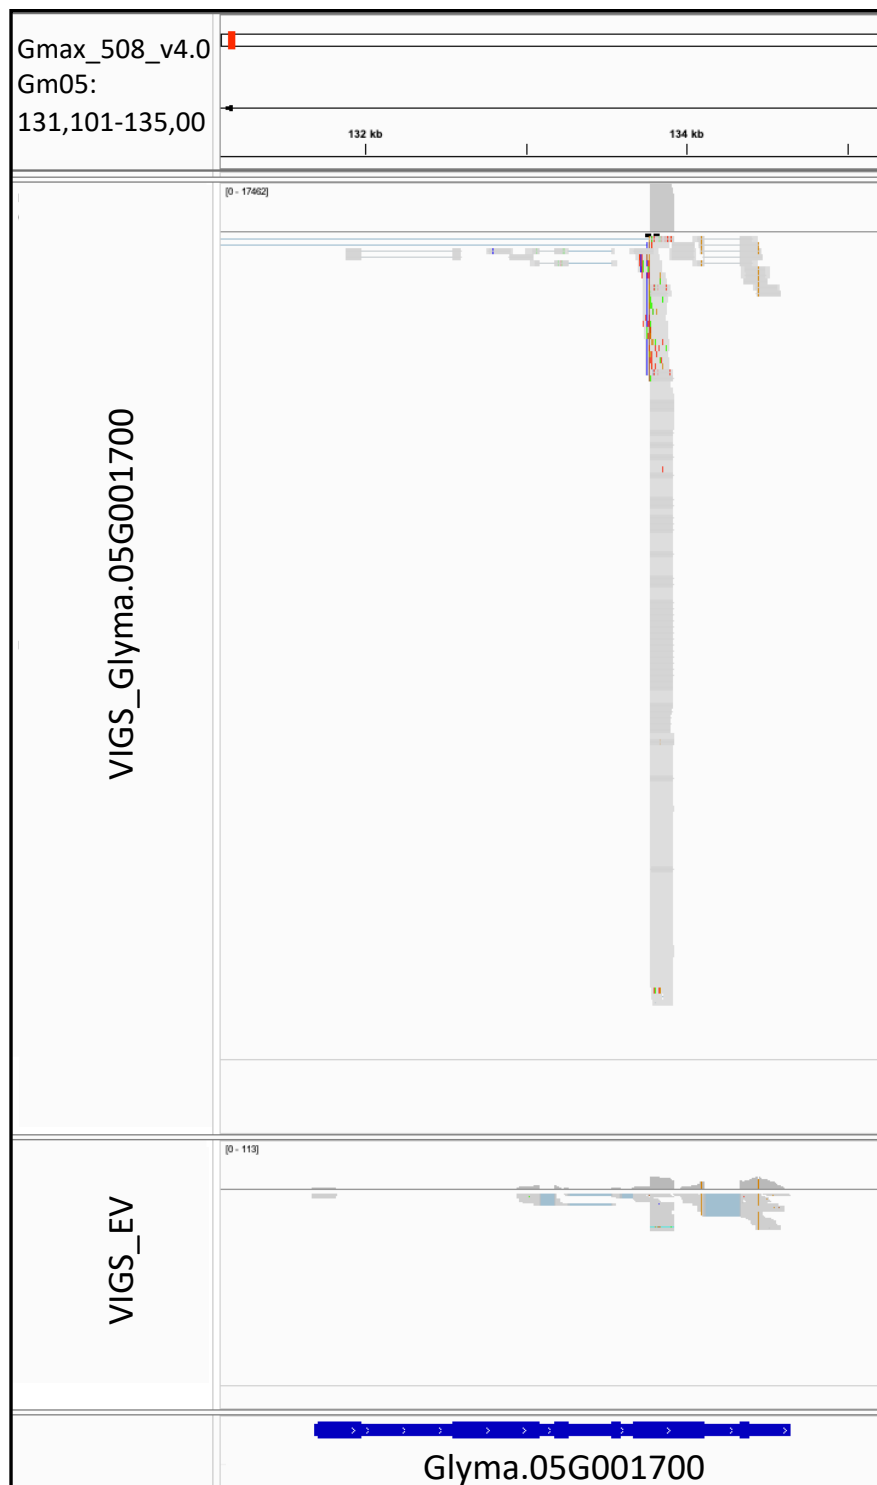

Supplemental Figure S2. Read Alignments in VIGS\_Glyma.05G001700 and VIGS\_EV. To demonstrate how reads map to the genome we loaded one replicate each of VIGS\_EV and VIGS\_5G001700 from 1D –Fe into the Integrated Genome Viewer program. These alignments demonstrate the excessive transcripts produced by the virus in the VIGS\_5G001700 sample, but not the VIGS\_EV sample. This confirms VIGS infection. The lack of additional reads flanking the viral reads in the VIGS\_Glyma.05G001700 sample compared to the VIGS\_EV sample confirms gene silencing.
